# Supplementary material for: Identification of a novel disulfideptosis-related gene signature for prognostic implication in lower-grade gliomas
Source: publisher site journal article supplement (doi:10.18632/aging.205688), 2024-03-27
Supplement: Supplementary file [file aging-v16i7-205688-supplementary-material-SD1.pdf]

**SUPPLEMENTARY FIGURE**

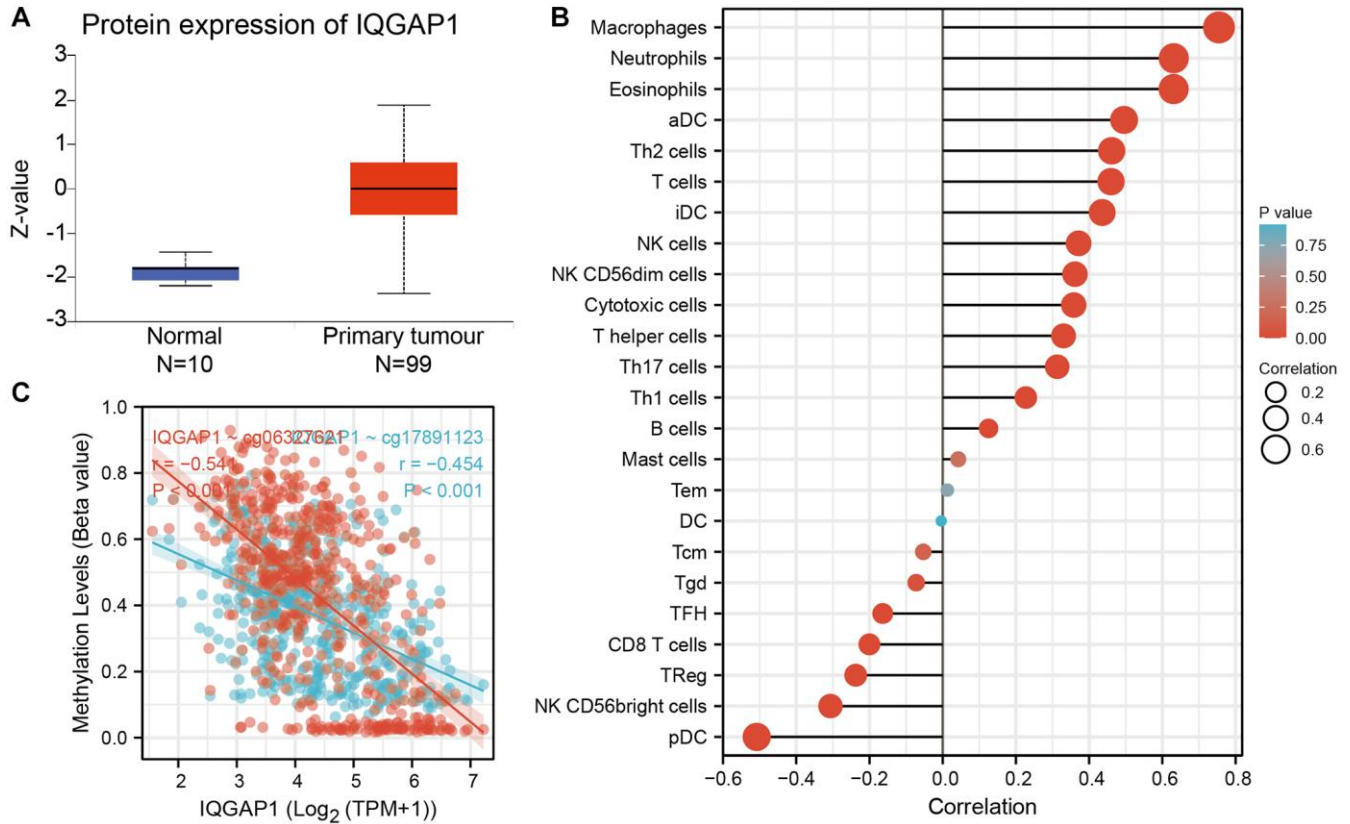

**Supplementary Figure 1. Characterization of IQGAP1.** (A) Protein expression of IQGAP1 in GBMLGG. (B) Relationship between IQGAP1 and tumor infiltrating immune cells. (C) Relationship between IQGAP1 and DNA methylation.
